# Supplementary material
Source: publisher figshare collection journal article supplement (https://karger.figshare.com/ndownloader/files/27788586)

Figure 4a: Forest plot showing overall mortality based on modality of RRT


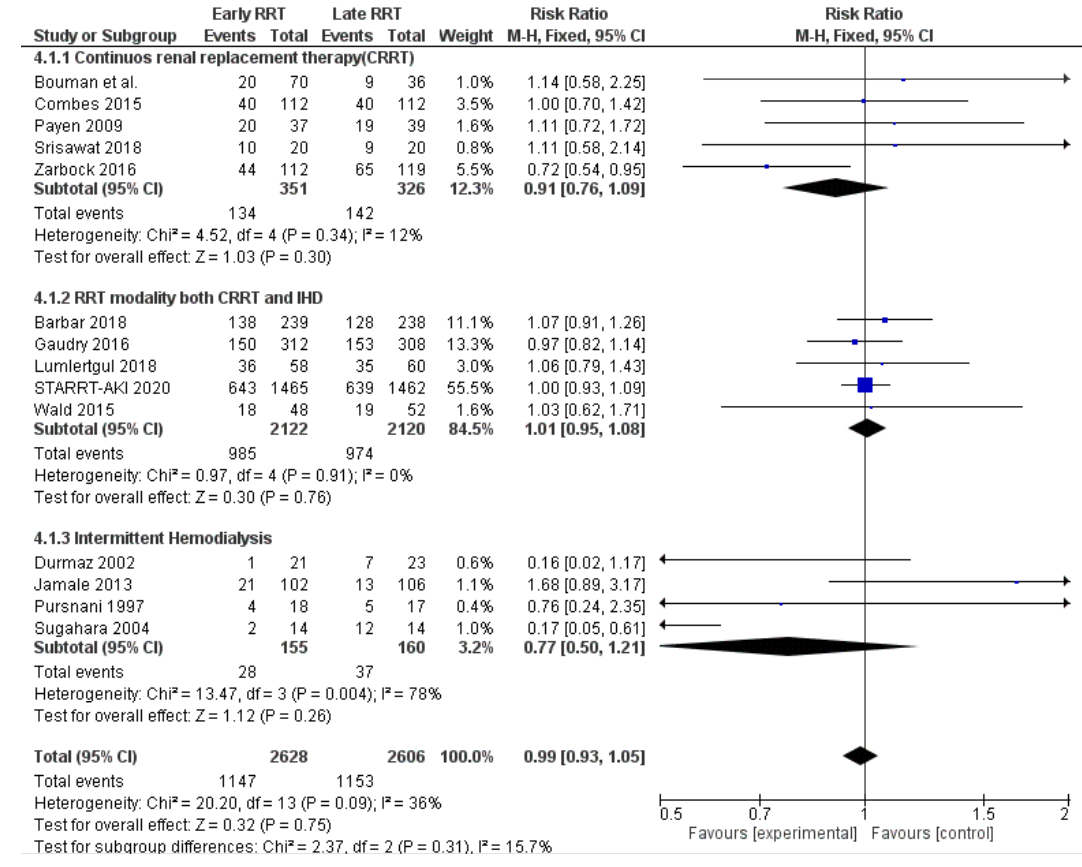


Supplementary Figure 4b: Forest plot showing day 30 mortality based on modality of RRT


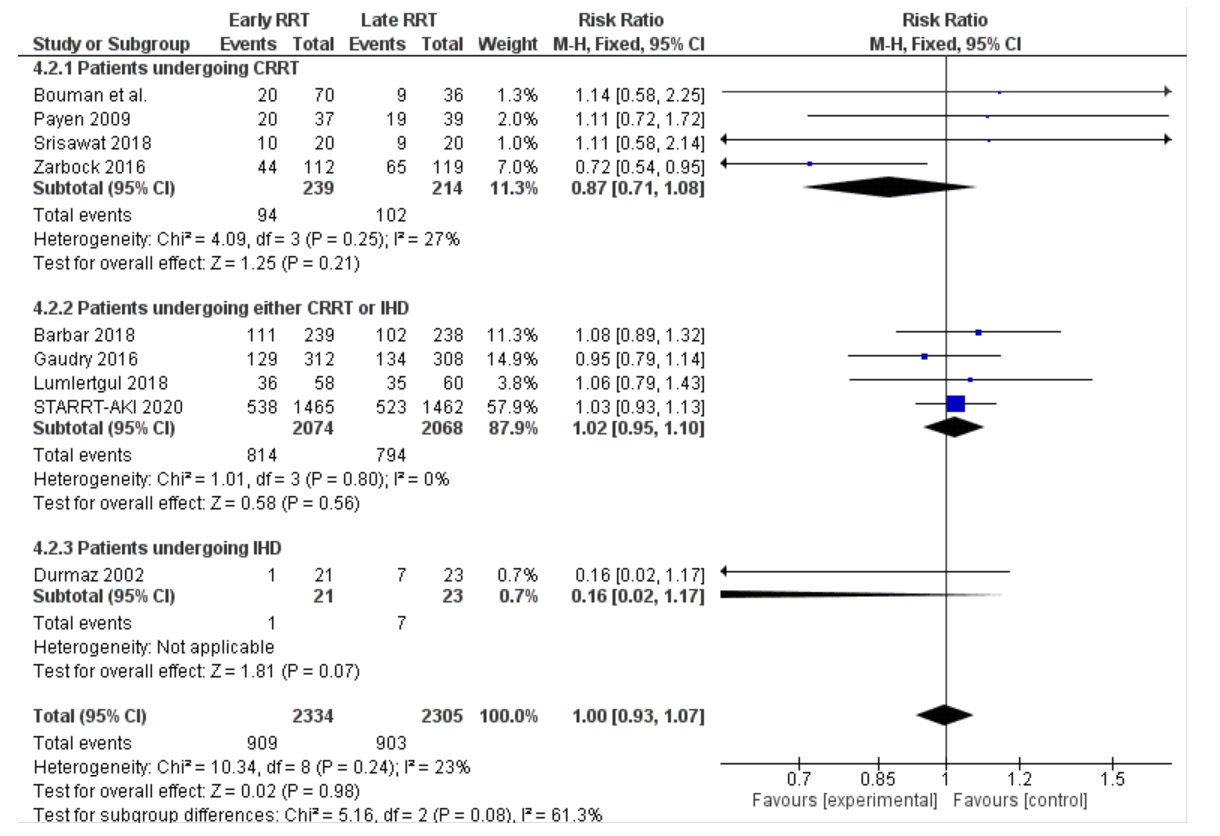


Supplementary Figure 4c: Forest plot showing day 90 mortality based on modality of RRT


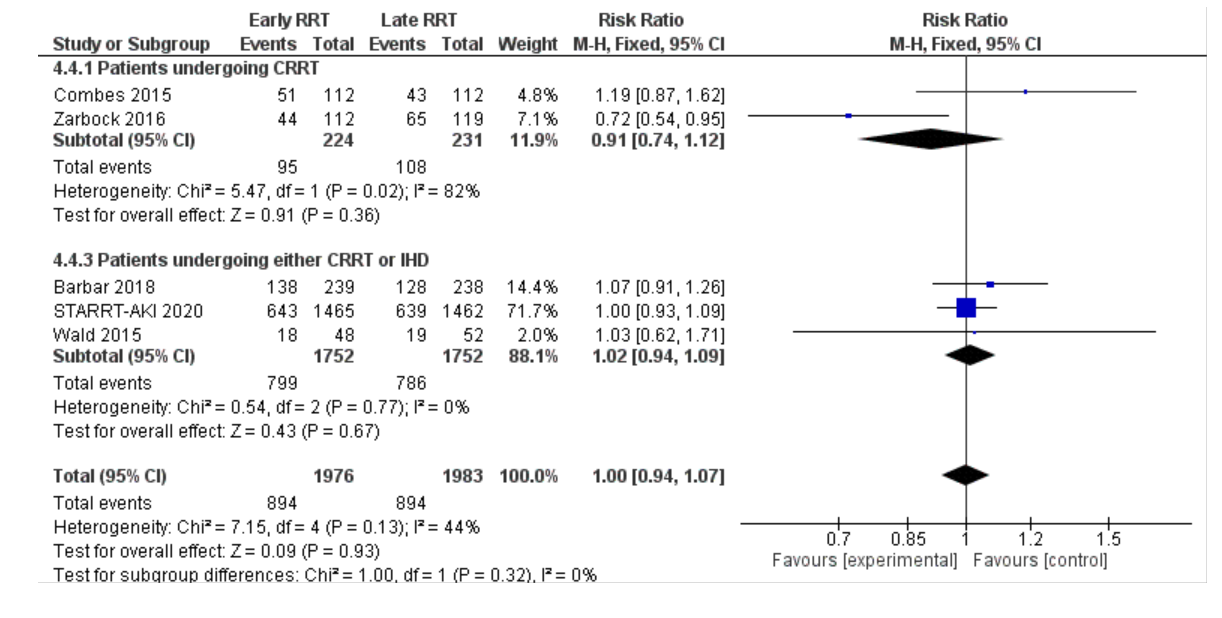


Supplementary Figure 4d: Forest plot showing overall ICU mortality based on RRT modality


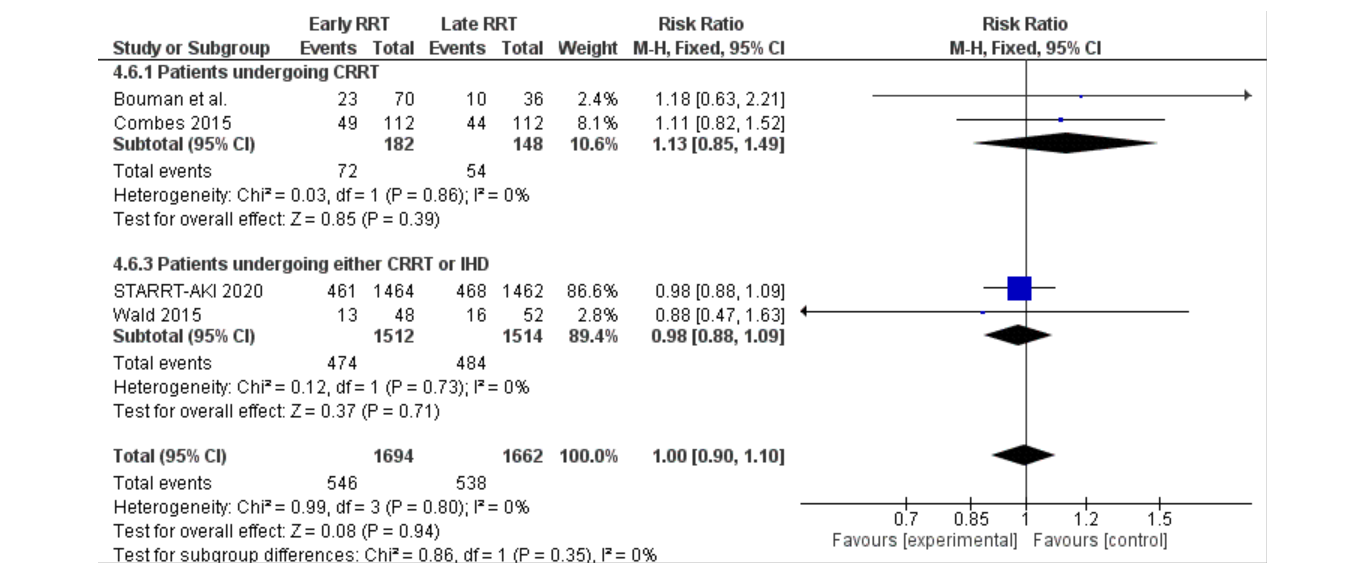

Supplement: Supplementary file 1 [file 27788586]
